# Supplementary material for: Financial conflicts of interest of clinicians making submissions to the pan-Canadian Oncology Drug Review: a descriptive study
Source: PubMed Central journal article supplement — BMJ Open. 2019 Jul 26;9(7):e030750. doi: 10.1136/bmjopen-2019-030750 (PMC6661552; doi:10.1136/bmjopen-2019-030750), 2019-07-26
Supplement: bmjopen-2019-030750supp002.pdf [file bmjopen-2019-030750supp002.pdf]

**Supplementary File 2: Number of times conflict with company mentioned**

| <b>Name of company</b> | <b>Number of times mentioned</b> |
|------------------------|----------------------------------|
| AbbVie                 | 8                                |
| Amgen                  | 20                               |
| Astellas               | 8                                |
| AstraZeneca            | 53                               |
| Away BioPharma         | 1                                |
| Bayer                  | 6                                |
| Boehringer Ingelheim   | 44                               |
| Bristol-Myers Squibb   | 48                               |
| Canadian L             | 1                                |
| Celgene                | 17                               |
| Eisai                  | 10                               |
| Eli Lilly              | 21                               |
| EMD Serono             | 3                                |
| ESMO                   | 2                                |
| Ferring                | 2                                |
| Genomic H              | 1                                |
| Gilead                 | 3                                |
| GlaxoSmithKline        | 3                                |
| Hoffman-LaRoche        | 34                               |
| Immunocore             | 2                                |
| Immunovaccine          | 1                                |
| Ipsen                  | 4                                |
| Janssen                | 34                               |
| Johnson & Johnson      | 4                                |
| Karyopharm             | 1                                |
| Lundbeck               | 4                                |
| Merck                  | 57                               |
| Merrimack              | 1                                |
| Millenium              | 2                                |
| Novartis               | 52                               |
| Otsuka                 | 1                                |
| Pfizer                 | 27                               |
| Sanofi Genzyme         | 8                                |
| Seattle Genetics       | 2                                |
| Shire                  | 2                                |
| Taiho                  | 2                                |
| Takeda                 | 11                               |
| Vitalie                | 1                                |
